# Supplementary material for: Dibasic esters as green solvents for PVDF membrane preparation
Source: Royal Society of Chemistry journal article supplement (doi:10.1039/d3gc02366d), 2023-01-01
Supplement: d3gc02366d1.pdf [file d3gc02366d1.pdf]

## Supplementary information

### Dibasic esters as green solvents for PVDF membrane preparation

Norafiqah Ismail <sup>a</sup>, Qiuyueming Zhou <sup>b</sup>, Qian Wang <sup>b</sup>, Zhaoliang Cui <sup>b</sup>, Nils Skoglund <sup>c</sup>, Naser

Tavajohi <sup>a,\*</sup>

<sup>a</sup> Department of Chemistry, Umeå University, 90187 Umeå, Sweden

<sup>b</sup> State Key Laboratory of Materials-Oriented Chemical Engineering, College of Chemical Engineering, Nanjing Tech University, Nanjing 211816, PR China

<sup>c</sup> Department of Applied Physics and Electronics, Umeå University, 90187 Umeå, Sweden

\*Corresponding authors: [naser.tavajohi@umu.se](mailto:naser.tavajohi@umu.se)

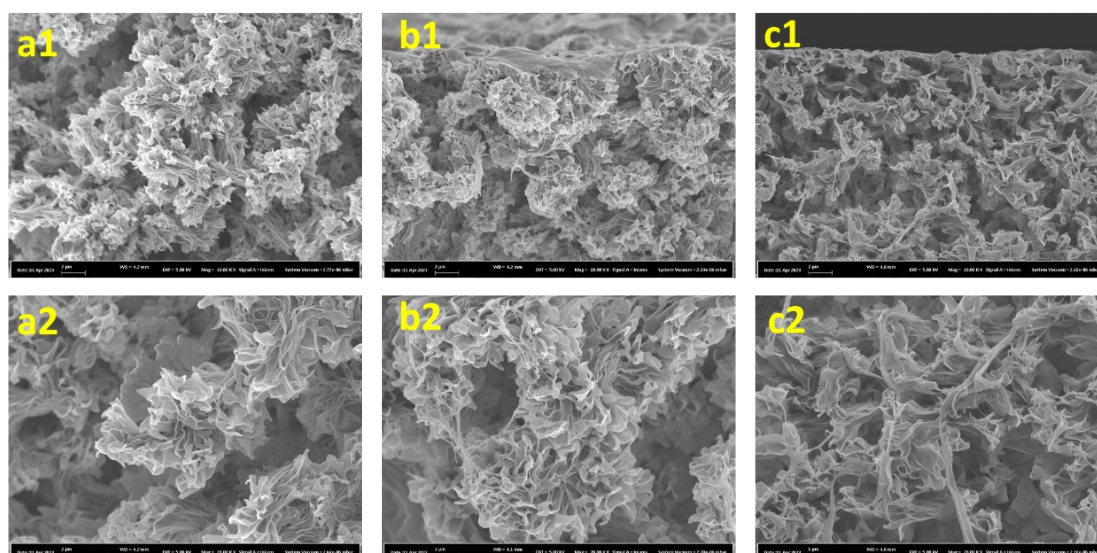

Figure S1. The cross-sectional images of a) PVDF/DMS, b) PVDF/DMG, and c) PVDF/DMS with 10k and 20k magnifications are denoted as 1 and 2, respectively.
